# Supplementary material for: Complementary Transcriptome and Proteome Analyses Provide Insight into the Floral Transition in Bamboo (Dendrocalamus latiflorus Munro)
Source: MDPI journal article supplement (doi:10.3390/ijms21228430), 2020-11-10
Supplement: s1 [file s1]

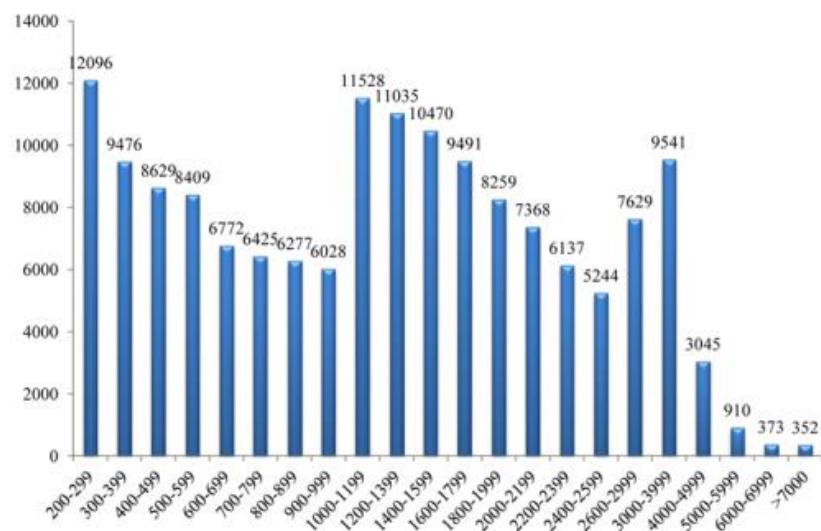

**Figure S1.** The length distribution of reconstructed reference sequences (dataset 1, dataset 2, dataset 3 and dataset 4) in *D. latiflorus*.

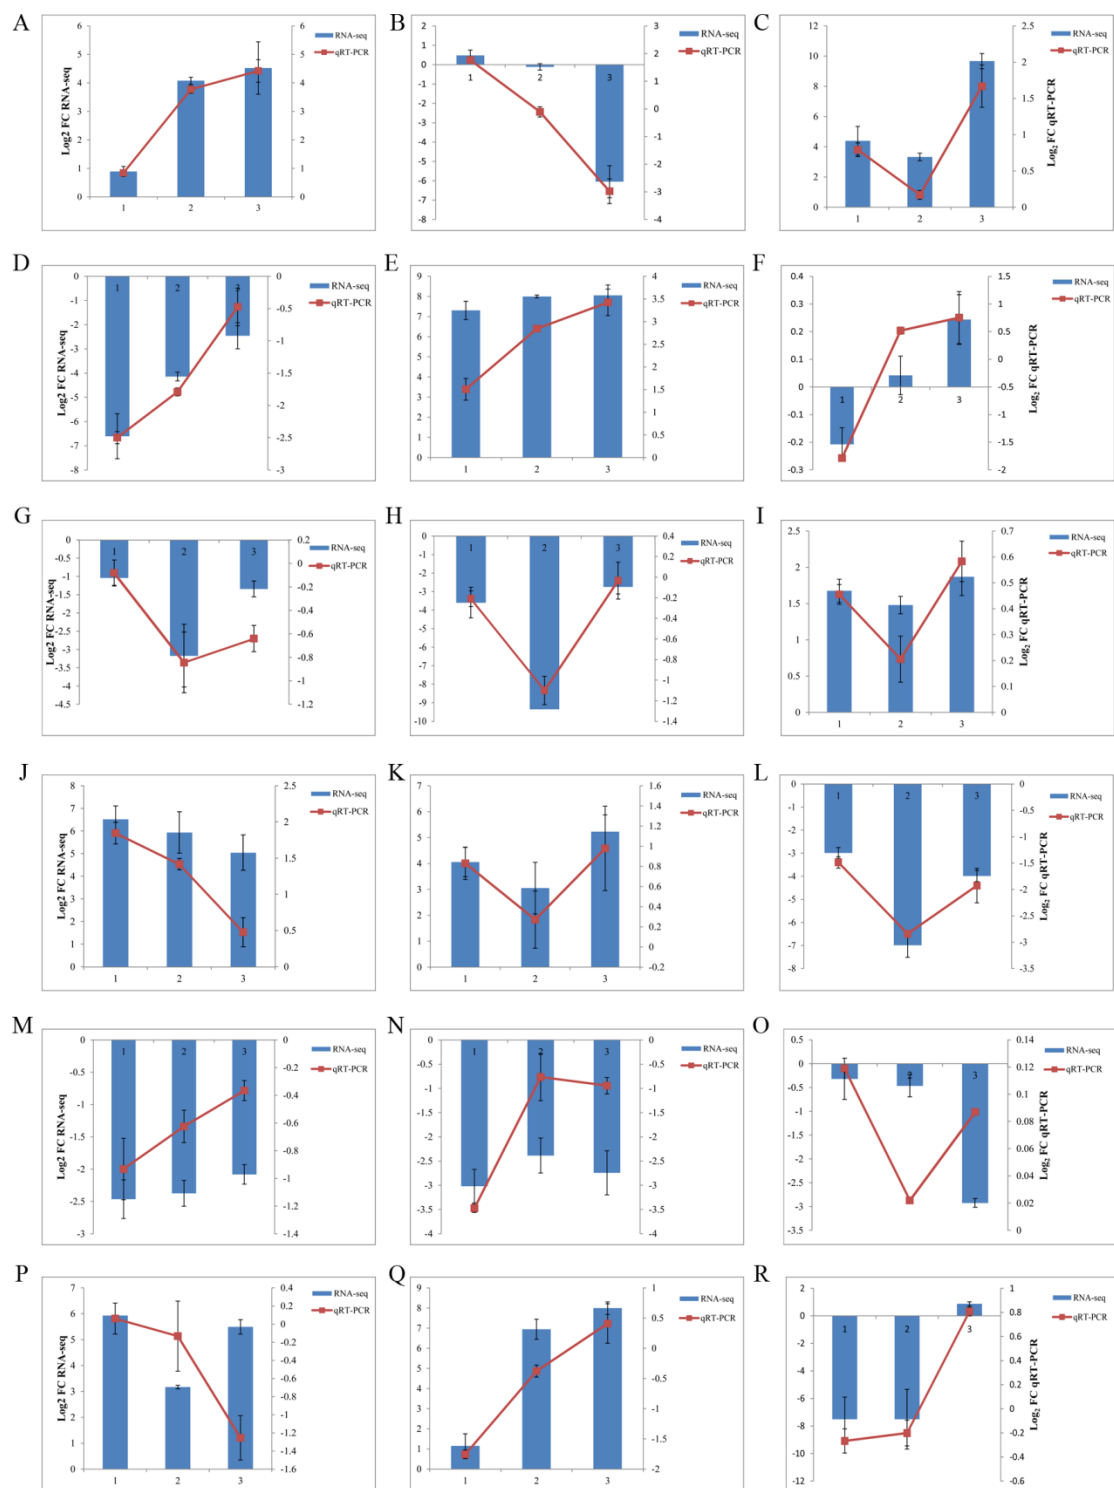

**Figure S2.** Quantitative RT-PCR validations. 18 genes were selected for the quantitative RT-PCR analysis, including Unigene49490 (A), Unigene57034 (B), Unigene108692 (C), Unigene32545 (D), Unigene114564 (E), Unigene120387 (F), Unigene103892 (G), Unigene104205 (H), Unigene109097 (I), Unigene110315 (J), Unigene130058 (K), Unigene137345 (L), Unigene30387 (M), Unigene32039 (N), Unigene33763 (O), Unigene36923 (P), Unigene39652 (Q), Unigene28224 (R) in L0, L1, L2 and L3. 1, 2, 3 showed the relative expression level of L1, L2, L3 compared to L0. Vertical lines represent standard error for an average of three biological replicates.

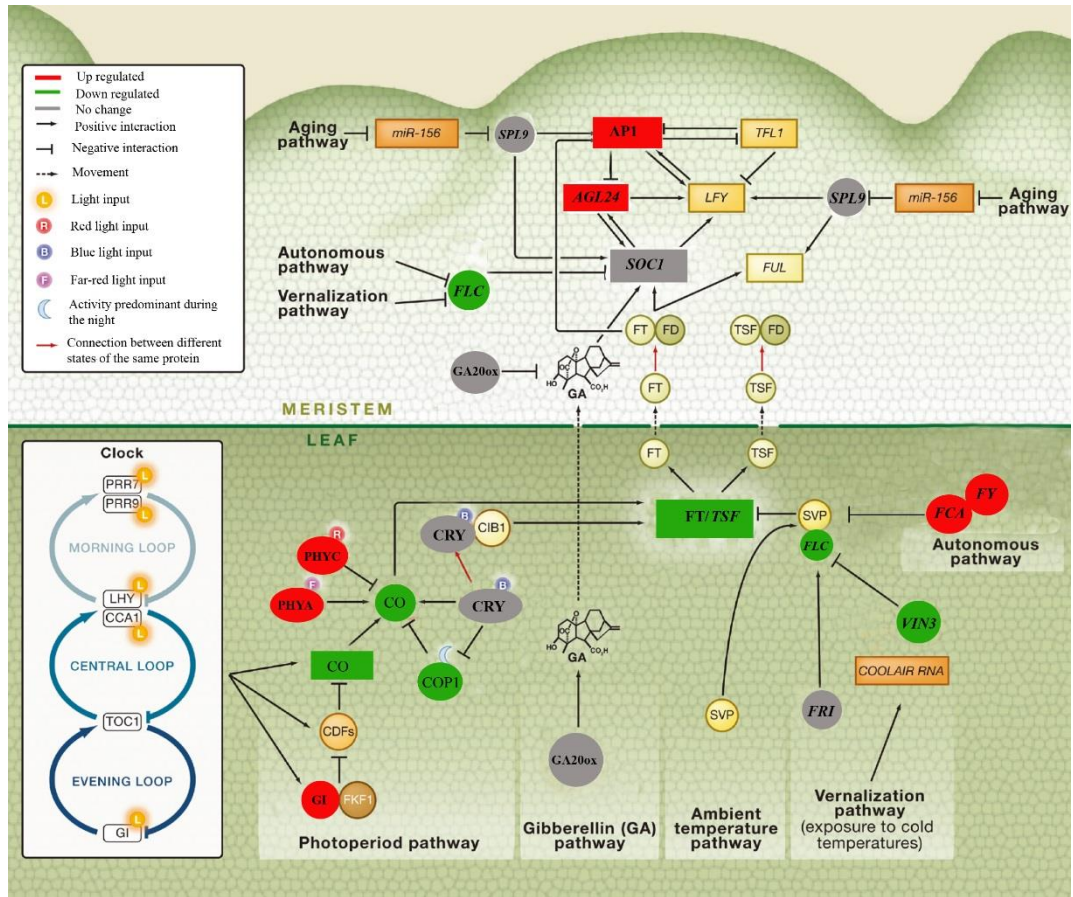

**Figure S3.** These unigenes were assigned into different pathways. Red indicated up-regulated, green indicated down-regulated and gray indicated no change in gene expression level. The gene expression level displayed L3 compared to the expression level of L0(Fornara, de Montaigu, & Coupland, 2010).

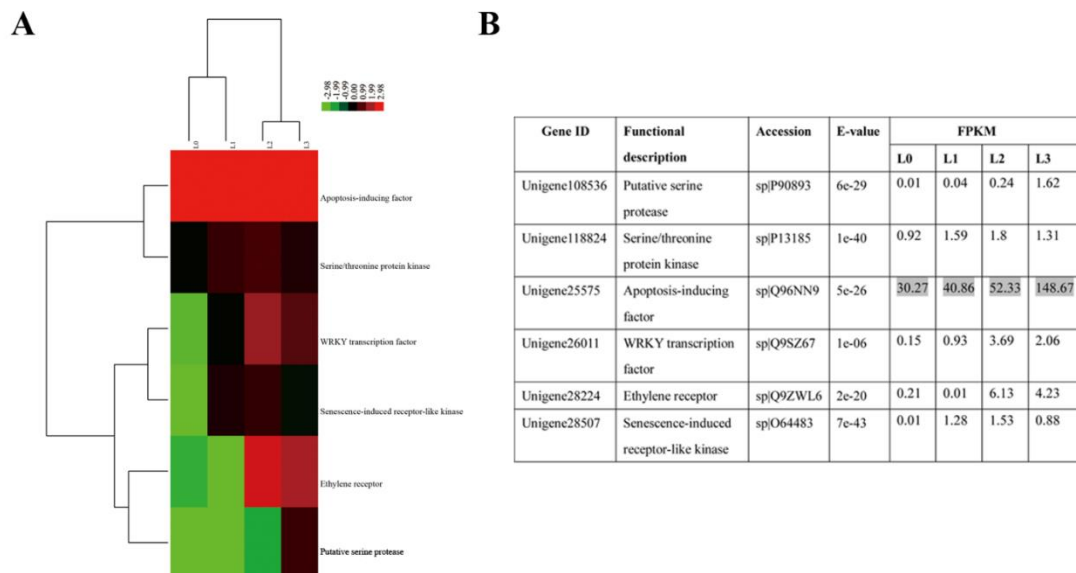

**Figure S4.** Senescence-associated genes during floral transition in *D. latiflorus*. A. Heat map showing relative expression of senescence-associated genes in the L0, L1, L2 and L3. Each row represents a gene. Expression differences are shown in different colors. Red means high expression and green means low expression. B. Tabular summary of expression values used to generate the heat map, with high FPKM value combinations highlighted in gray.

# PLANT HORMONE SIGNAL TRANSDUCTION

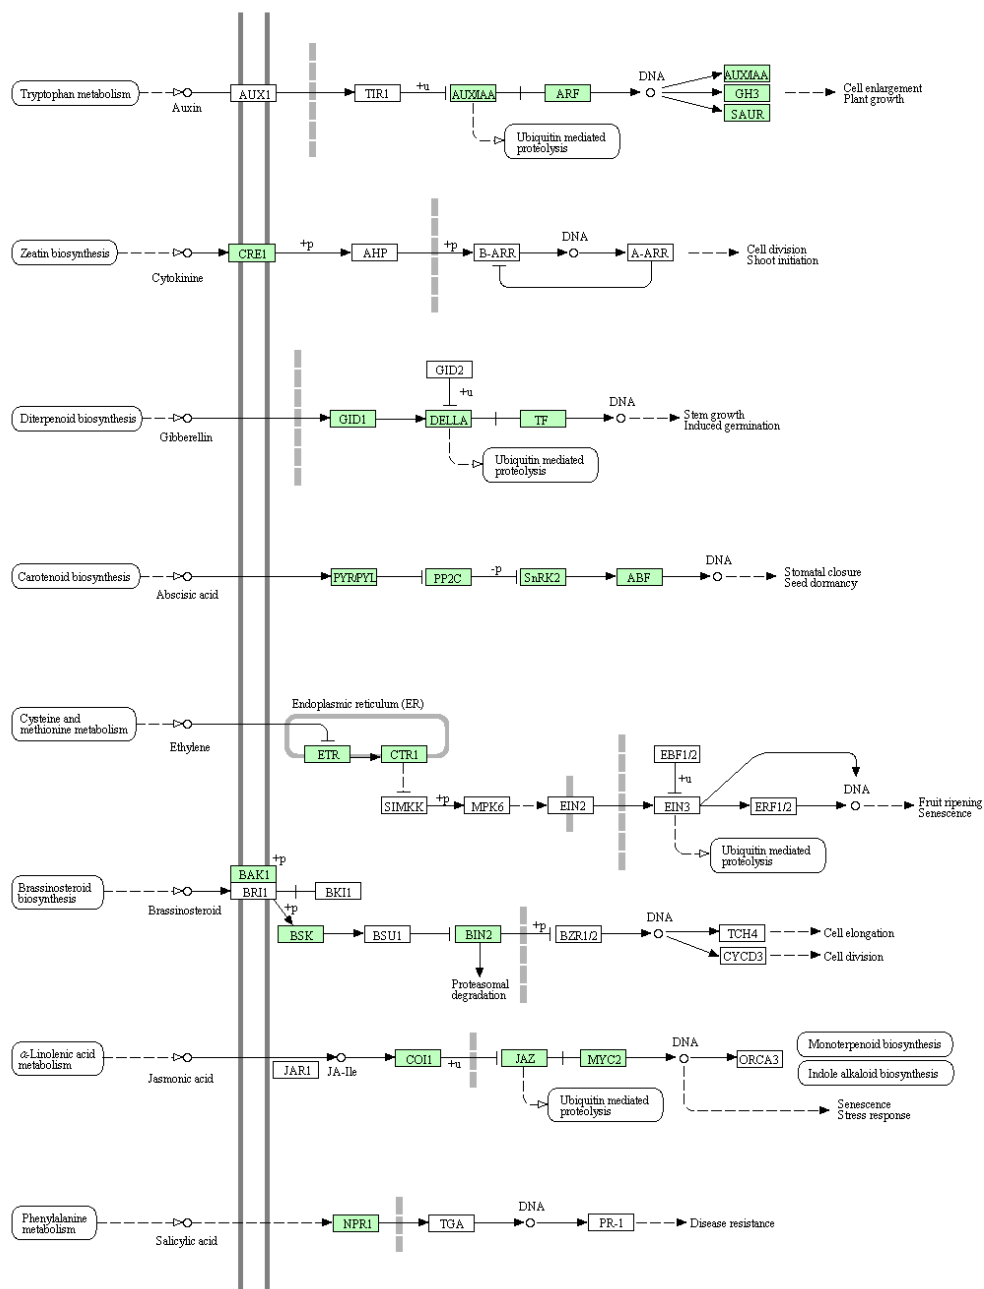

**Figure S5.** Plant hormone signal transduction for unigenes by KEGG annotation.

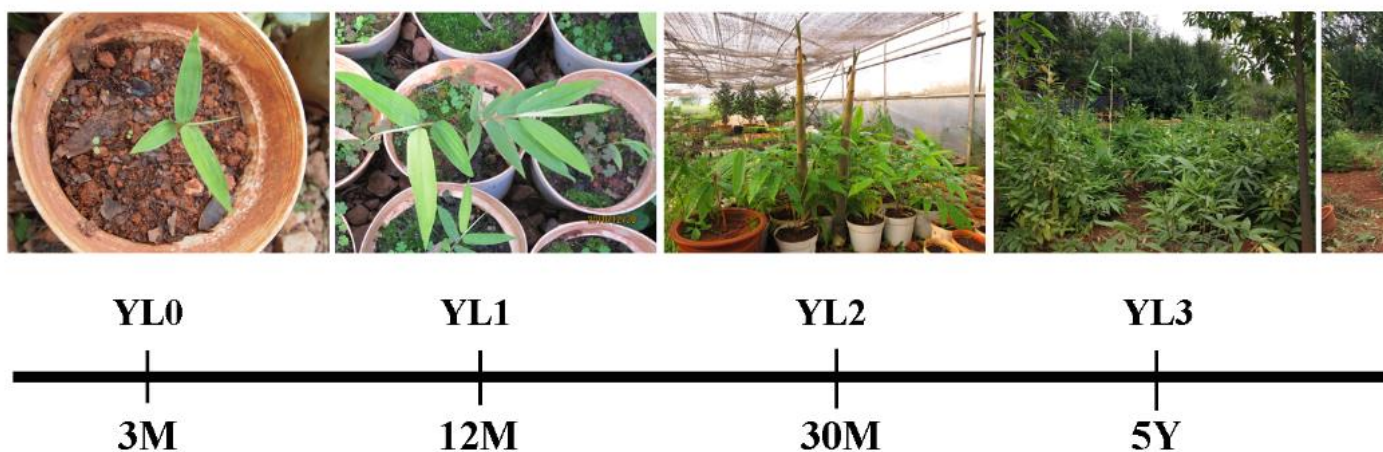

**Figure S6.** The bamboo seedlings of different ages. YL0: the seedlings of 3 months; YL1: the seedlings of 12 months; YL2: the seedlings of 30 months; YL3: the seedlings of 5 years; YL4: the seedlings of 6 years. YL0, YL1 and YL2 were planted in the greenhouse. YL3 and YL4 were planted out of the greenhouse. .

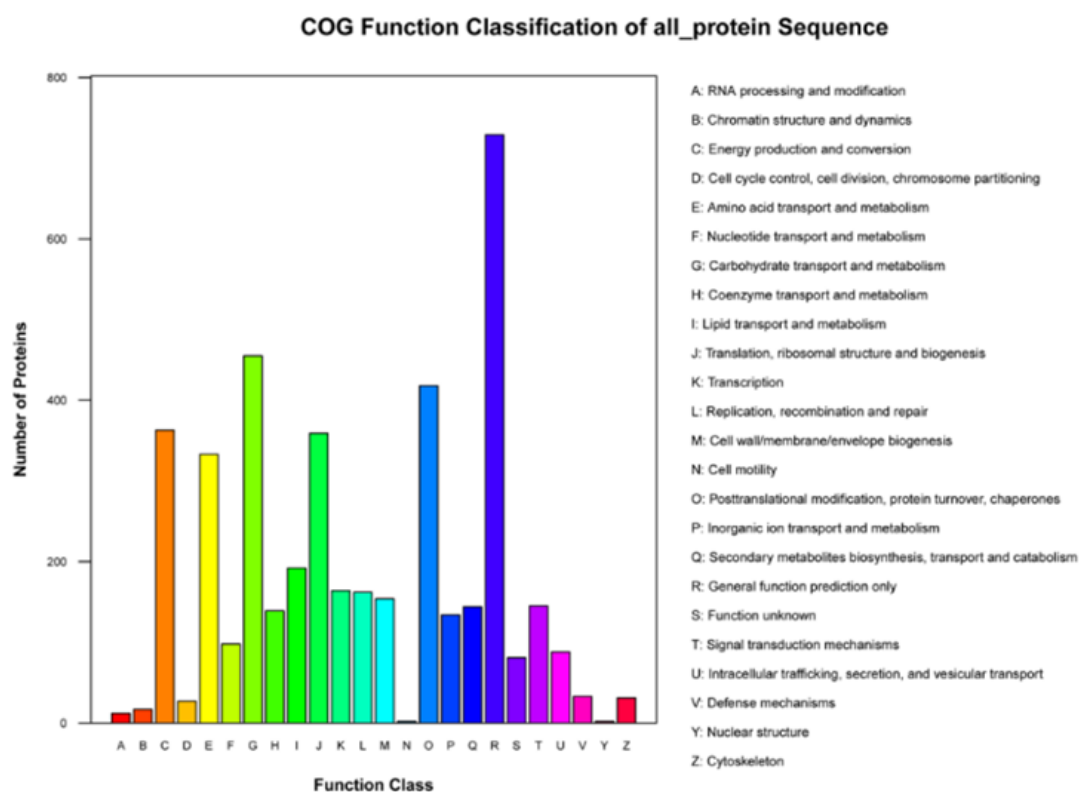

**Figure S7.** COG functional classifications of the *D. latiflorus* proteomics.

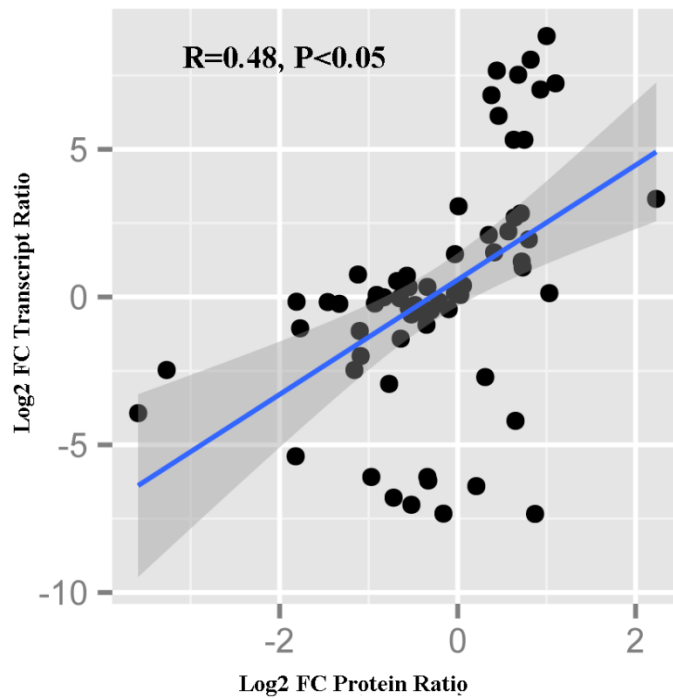

**Figure S8.** Concordance between changes in the protein and corresponding transcripts.

**Table 1.** Summary of sequencing data and alignment statistics (1, 2, 3 represented repeat 1, 2, 3, respectively).

| Libray | No. of raw reads | Total length (bp) | Total bases (trimmed) | Total length (bp) of high-quality reads | Mapping ratio % ( $\leq 3$ bp mismatch) | Mapping ratio % ( $\leq 2$ bp mismatch) |
|--------|------------------|-------------------|-----------------------|-----------------------------------------|-----------------------------------------|-----------------------------------------|
| 1-L0   | 23314262         | 2331426200        | 19,915,018            | 1,737,915,587                           | 91.07                                   | 89.18                                   |
| 2-L0   | 14588714         | 1415105258        | 12,092,374            | 1,060,319,827                           | 80.55                                   | 75.77                                   |
| 3-L0   | 16291476         | 1580273172        | 13,306,428            | 1,144,643,922                           | 81.39                                   | 76.68                                   |
| 1-L1   | 16291392         | 1629139200        | 14,184,838            | 1,220,133,252                           | 93.89                                   | 92.7                                    |
| 2-L1   | 19893454         | 1929665038        | 16,461,692            | 1,415,549,817                           | 82.3                                    | 77.71                                   |
| 3-L1   | 11424758         | 1108201526        | 9,568,666             | 826,388,750                             | 81.64                                   | 77.19                                   |
| 1-L2   | 23885568         | 2316900096        | 20,098,070            | 1,674,574,399                           | 92.71                                   | 91.54                                   |
| 2-L2   | 13408704         | 1300644288        | 11,154,754            | 966,968,998                             | 81.26                                   | 76.53                                   |
| 3-L2   | 16328340         | 1583848980        | 13,508,604            | 1,164,116,872                           | 81.03                                   | 76.27                                   |
| 1-L3   | 20567834         | 2056783400        | 18,028,992            | 1,554,070,513                           | 92.05                                   | 90.64                                   |
| 2-L3   | 16266184         | 1577819848        | 13,485,326            | 1,166,389,856                           | 81.06                                   | 76.34                                   |
| 3-L3   | 14418964         | 1398639508        | 11,853,156            | 1,022,707,425                           | 81.33                                   | 76.62                                   |

**Table S2.** Statistics of annotation results for *D. latiflorus* unigenes.

| Sequence file | All  | NR   | UniprotKB | GO   | KEGG |
|---------------|------|------|-----------|------|------|
| L0_L1-unigene | 3179 | 3045 | 2552      | 1861 | 1289 |
| L0_L2-unigene | 1732 | 1670 | 1415      | 988  | 709  |
| L0_L3-unigene | 4376 | 4129 | 3430      | 2478 | 1719 |

**Table S3.** Primers pairs used for Quantitative Real-Time PCR.

| Gene ID       | Description                                                             | Primer                       |                               |
|---------------|-------------------------------------------------------------------------|------------------------------|-------------------------------|
|               |                                                                         | Forward (5'- 3')             | Reverse (5'- 3')              |
| Unigene49490  | MADS-box transcription factor 50-like                                   | GTCGCGCTCGTCGTCTTC           | ACATTGTCGGTATCGGCTGAT         |
| Unigene57034  | zinc finger CCCH domain-containing protein 55-like                      | AGGGCGAGGTAAAGGCAGAA         | AGCAGGTCCTCCGGATGTT           |
| Unigene108692 | flower development related protein                                      | GGTCGCGCTCATCGTCTT           | CGATTTGCCTGGTCTCCAAT          |
| Unigene32545  | Ethylene-forming enzyme                                                 | TCGCTCTCCATGGACTTGAAG        | GGCGTATCCCAAGTTCGTGTT         |
| Unigene114564 | zinc finger protein CONSTANS-LIKE 13-like isoform X2                    | GGGTCCCCGAGTTTGAGAAG         | GGAAGCCATGGCAGGAAGT           |
| Unigene120387 | putative 29 kDa ribonucleoprotein A, chloroplast precursor              | AGCCGTGGATTTGGATTCTG         | CCCTCAGAGCTCTTCCTTGAAA        |
| Unigene103892 | light harvesting chlorophyll a-b binding protein 2-1                    | CGGAGATCCTGTCCAAGA           | GGTAAACCTTGTGCGAGCC           |
| Unigene104205 | heat shock protein 70                                                   | CTTCTCCACCTACTCGGACAAC       | CTCAAACCTTGCCCAGCAGGTT        |
| Unigene109097 | ribulose biphosphate carboxylase/oxygenase activase, chloroplastic-like | CAGCGAGTTCCCTGACTCAATC       | CCAAACCAAGCTCTGGACTTCT        |
| Unigene110315 | protein TRIGALACTOSYLDIACYLGLYCEROL 2, chloroplastic-like               | AGGATGAAAGGACAGCAAGGAG<br>TA | TGCAACTTTTTTCGGCCAACT         |
| Unigene130058 | chlorophyllase-2, chloroplastic-like                                    | CGGAGATGGACACCTTGGT          | GCCCTCAGCTTTACACGATAT         |
| Unigene137345 | 17.8 kDa class II heat shock protein-like                               | TGTCCATGTCGGCGTTCTC          | TCAAGGTGCAGGTGGAGGA           |
| Unigene30387  | photosystem I reaction center subunit IV, chloroplastic-like            | GATCCGTCGTACAGTTGAT          | GTCCAGGGCGTAGTTGTTG           |
| Unigene32039  | chlorophyll a-b binding protein CP24 10B, chloroplastic-like            | GCTTGCCAATGCCTCATCAGT        | TGAACTCGGCGTCGCTCTT           |
| Unigene33763  | putative UVB-resistance protein (UVR8)                                  | TGATTGCTGCTGGTGCTGAG         | CGCCATCCACATGCAACAAG          |
| Unigene36923  | probable protein arginine N-methyltransferase 6.1-like                  | GGCACTGGGCTACGATCATC         | TCACGACCCTCAATCTCAACCT        |
| Unigene39652  | MADS15 protein                                                          | CTGAAGCGGATCGAGAACAAG        | CGTCGCAGAGGACGGAGAT           |
| Unigene28224  | cytokinin receptor CRE1b, putative, expressed                           | AGTTCCTTGCAACTGTTTCTCATG     | GGGTTGTCTTTAGTTCTGTGCCTA<br>A |
| EF1 $\alpha$  | Reference gene                                                          | GTTGTTACCTTTGGTCCCAGCGG      | TGGCAGGGTCATCCTTGGAGTTG       |

**Table S4.** Expression of the same clump of *D. latiflorus* flowering biomarkers in floral transition. FPKM, fragments per kilobase of exon per million fragments mapped. Genes with ratio values less than unity show increased expression during early stages of floral development; genes with ratio values greater than unity show increased expression during later stages.

| GENE ID                                         | Function discription (GO)                                                                                                  | e-value  | FPKM (L1) | FPKM (L2) | FPKM (L3) | L2:L1 | L3:L2 |
|-------------------------------------------------|----------------------------------------------------------------------------------------------------------------------------|----------|-----------|-----------|-----------|-------|-------|
| <b>Continue increase in the gene expression</b> |                                                                                                                            |          |           |           |           |       |       |
| Unigene39652                                    | MADS14 protein                                                                                                             | 3.00E-86 | 0.6       | 9.84      | 43.1      | 16.4  | 4.38  |
| Unigene138210                                   | loosening and extension of plant cell walls                                                                                | e-150    | 0.06      | 3.19      | 13.7      | 53.17 | 4.29  |
| Unigene43312                                    | loosening and extension of plant cell walls                                                                                | e-145    | 0.2       | 3.46      | 15.56     | 17.3  | 4.50  |
| Unigene10723                                    | Regulates floral architecture and leaf development                                                                         | 4.00E-55 | 0.01      | 0.67      | 3.32      | 67    | 4.96  |
| Unigene114865                                   | Probable transcription factor involved in plant development<br>PREDICTED: scarecrow-like protein 14-like [Setaria italica] | 0        | 0.01      | 0.48      | 2.5       | 48    | 5.21  |
| Unigene111037                                   | Absciscic acid 8'-hydroxylase 3                                                                                            | 6.00E-11 | 0.01      | 0.34      | 6.8       | 34    | 20    |
| <b>Continue decrease in the gene expression</b> |                                                                                                                            |          |           |           |           |       |       |
| Unigene38555                                    | Promotes plant stress tolerance such as heat, chilling, salinity and methylviologen                                        | 6.00E-67 | 39.36     | 3.31      | 1.2       | 0.08  | 0.36  |
| Unigene41907                                    | FAR1-RELATED SEQUENCE 5                                                                                                    | 5e-25    | 1.98      | 0.19      | 0.01      | 0.10  | 0.05  |
| Unigene21870                                    | Sugar transport protein 11                                                                                                 | 2e-10    | 16.7      | 2.67      | 0.01      | 0.16  | 0.004 |
| Unigene49486                                    | Regulates shoot apical meristem (SAM) initiation and maintenance                                                           | 9e-24    | 1.46      | 0.54      | 0.01      | 0.37  | 0.02  |



|               |                                                                                                                                        |       |       |      |      |      |      |
|---------------|----------------------------------------------------------------------------------------------------------------------------------------|-------|-------|------|------|------|------|
| Unigene112435 | negatively regulates salicylic acid- (SA-) dependent defense responses, abscisic acid (ABA) signaling, and ethylene-induced senescence | 3e-21 | 1.31  | 0.36 | 0.05 | 0.27 | 0.14 |
| Unigene133805 | Modulates plant transpiration efficiency                                                                                               | 0     | 1.23  | 0.28 | 0.01 | 0.23 | 0.04 |
| Unigene14850  | Transcription factor bHLH13                                                                                                            | 6e-67 | 2.97  | 0.82 | 0.36 | 0.28 | 0.44 |
| Unigene14377  | Glutamate synthase 1 [NADH], chloroplastic                                                                                             | 0     | 0.82  | 0.29 | 0.05 | 0.35 | 0.17 |
| Unigene137525 | Outer envelope protein 61, chloroplastic                                                                                               | 0     | 4.8   | 1.71 | 0.89 | 0.36 | 0.52 |
| Unigene12963  | C-terminal processing peptidase, chloroplastic                                                                                         | 2e-65 | 1.14  | 0.48 | 0.15 | 0.42 | 0.31 |
| Unigene99180  | Involved in the regulation of stomatal aperture                                                                                        | 0     | 0.98  | 0.38 | 0.01 | 0.39 | 0.03 |
| Unigene27191  | May be involved in oxidative stress response                                                                                           | e-113 | 10.81 | 6.13 | 2.41 | 0.57 | 0.39 |

**Table S5.** The pathway and the products involved in the pathway of plant hormone signal transduction.

| Pathway                             | Product         | Pathway ID |
|-------------------------------------|-----------------|------------|
| Tryptophan metabolism               | Auxin/IAA       | Ko00380    |
| Zeatin biosynthesis                 | Cytokinin       | Ko00908    |
| Diterpenoid biosynthesis            | Gibberellin     | Ko00904    |
| Carotenoid biosynthesis             | Absciscic acid  | Ko00906    |
| Cysteine and methionine metabolism  | Ethylene        | Ko00270    |
| Brassinosteroid biosynthesis        | Brassinosteroid | Ko00905    |
| $\alpha$ -Linolenic acid metabolism | Jasmonic acid   | Ko00591    |
| Phenylalanine metabolism            | Salicylic acid  | Ko00360    |
